# Supplementary material
Source: PubMed Central journal article supplement (PMC3167504)
Supplement: 1104636108_pnas.201104636SI.pdf [file 1104636108_pnas.201104636SI.pdf]

# Supporting Information

Hou et al. 10.1073/pnas.1104636108

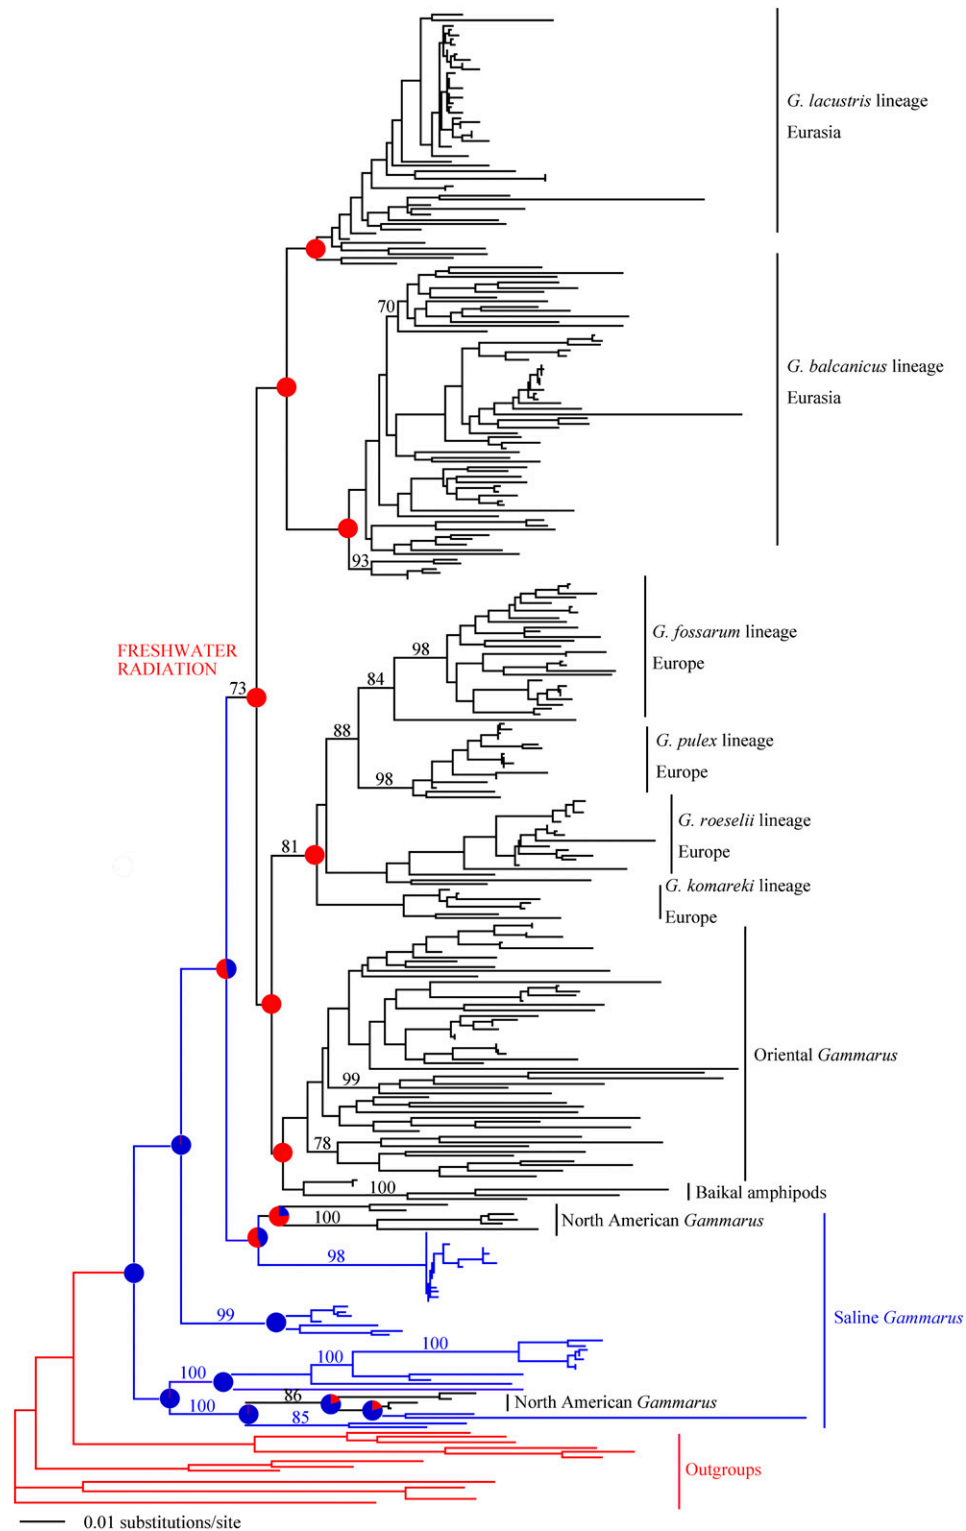

**Fig. S1.** Maximum likelihood phylogram inferred from the complete 305 taxa dataset with bootstrap values >70 above branches. Tribal ranks are reported to the *Right* of the tree. Terminal branches are in blue for saline species, black for freshwater species, and red for outgroups. Proportional likelihoods of ancestral states are mapped onto each node of interest (red, freshwater; blue, saline).

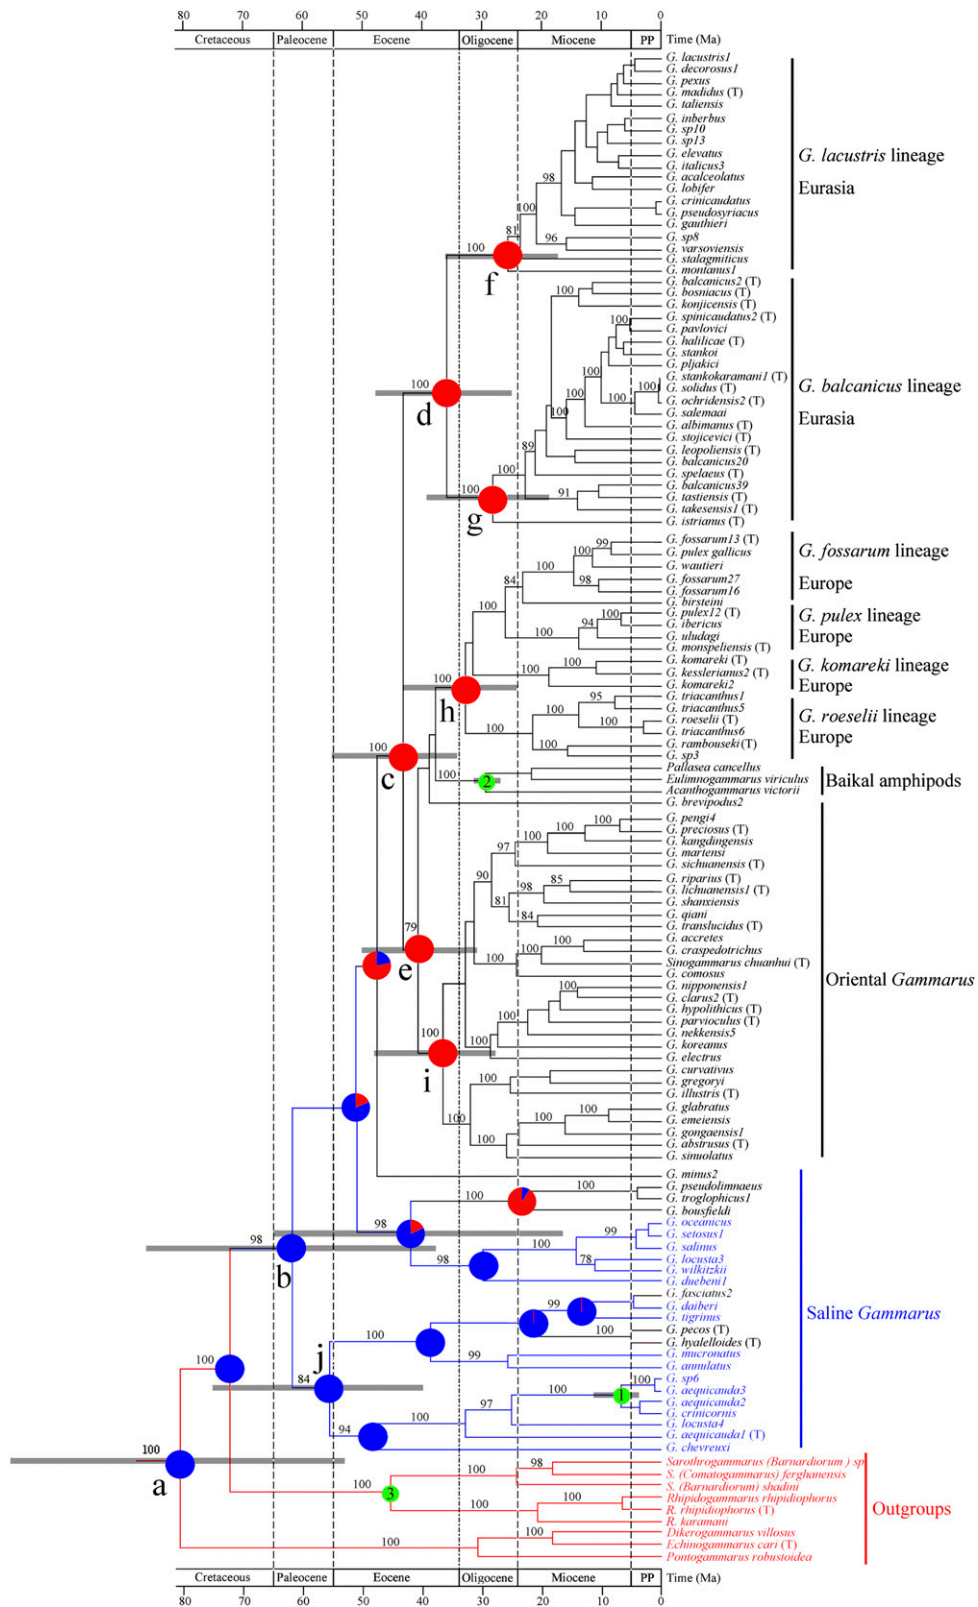

Fig. S2. Maximum clade credibility chronogram inferred from a BEAST dating analysis. Node bars represent 95% posterior credibility intervals for nodes of interest (a–j). Nodes 1, 2, and 3 are used for calibration. Posterior probabilities >70% are given above branches. Species names and terminal branches are in blue for saline species, black for freshwater species, and red for outgroups. Tribal ranks are reported to the *Right* of the tree. Proportional likelihoods of ancestral states are mapped onto each node of interest (red, freshwater; blue, saline).
